# Supplementary material for: Differential Regulation of Genes by the Glucogenic Hormone Asprosin in Ovarian Cancer
Source: MDPI journal article supplement (doi:10.3390/jcm11195942), 2022-10-08
Supplement: s1 [file s1]

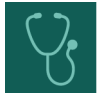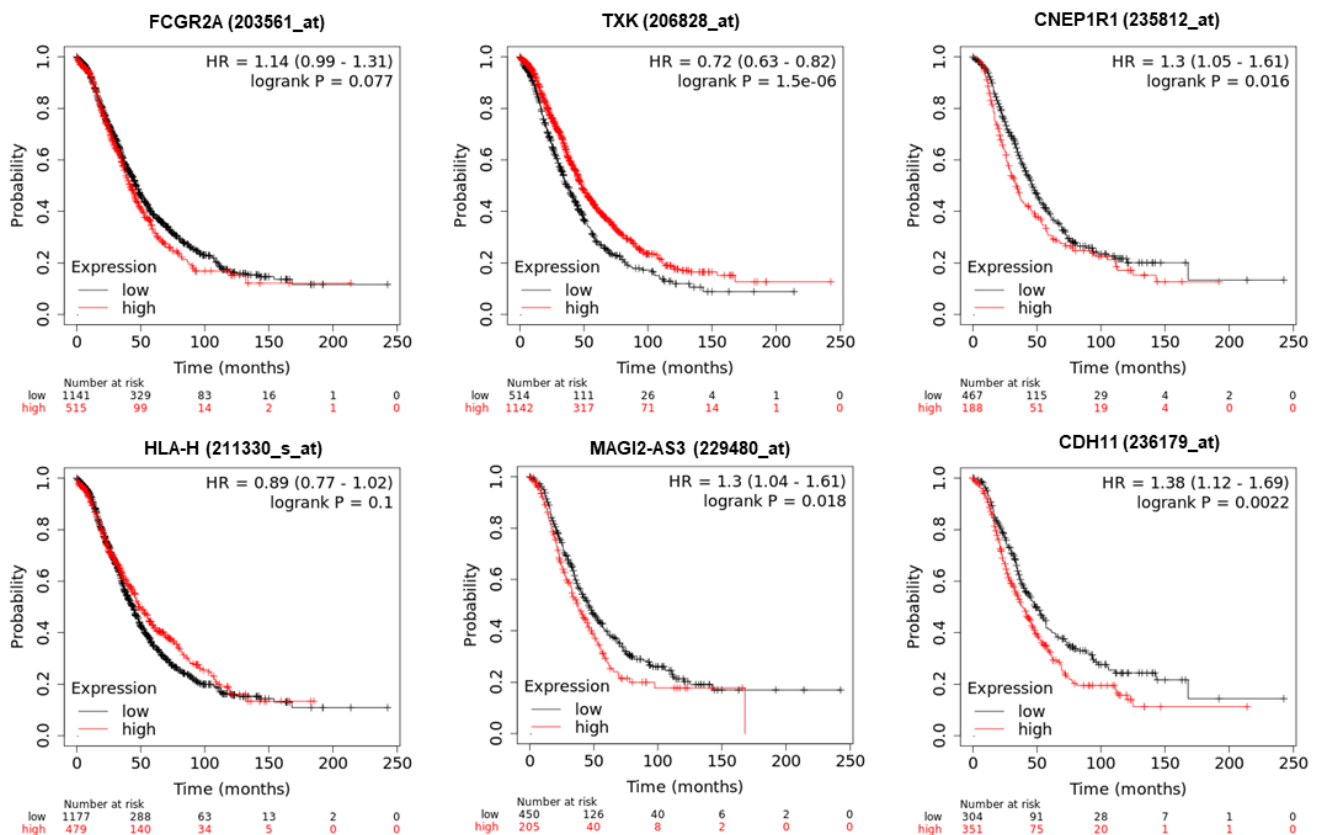

**Supplementary Figure S1.** Kaplan Meier plots showing overall survival (OS) of OvCa patients with dysregulation of the following genes: A, FCGR2A (p = not significant); B, TXK (\*p = 0.000015); C, CNEP1R1 (\*p = 0.016); D, HLA-H (p = not significant); E, MAGIC-AS3 (\*p = 0.018); F, Alb (\*p = 0.0022).

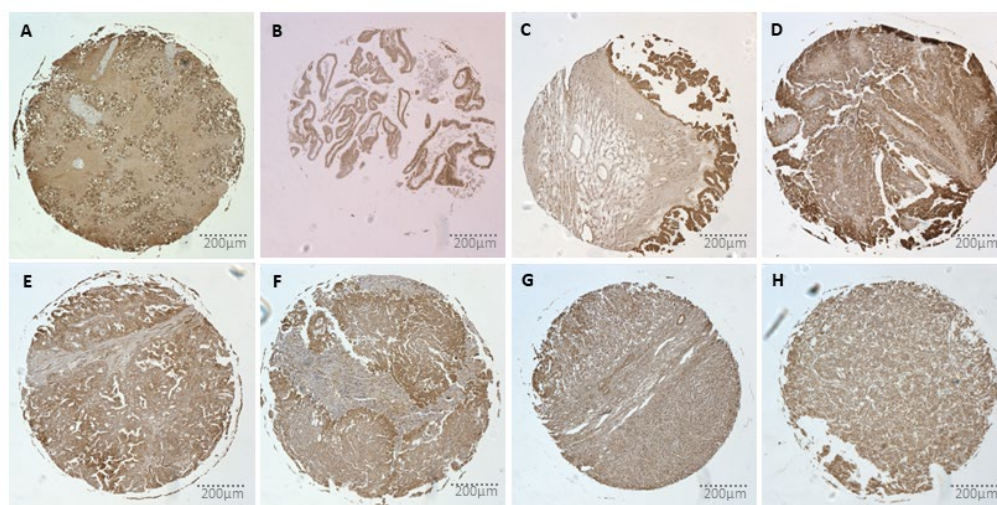

**Supplementary Figure S2.** Immunohistochemical Staining for TLR4 in ovarian cancers and control tissues at x10 magnification. **A.** Clear Cell Carcinoma, stage II; **B,** Low Grade Serous Carcinoma, stage II; **C,** Endometrioid adenocarcinoma, stage I; **D,** High Grade Serous Carcinoma, stage III; **E,** Mucinous Adenocarcinoma, stage III; **F,** Lymph node metastasis from Ovary; **G,** Normal adjacent ovarian tissue; **H,** Control tissue Adrenal Pheochromocytoma.

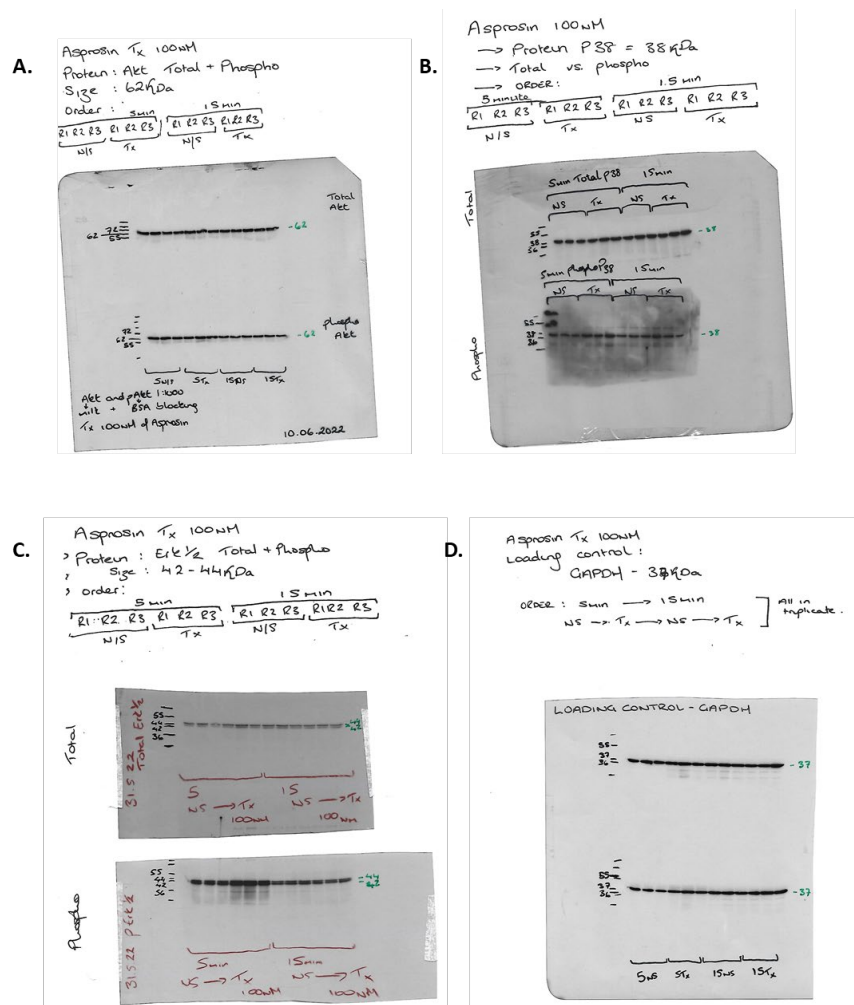

**Supplementary Figure S3.** Raw data from Western blotting experiments **A.** Total and phospho-Akt; **B.** Total and phospho-p38; **C.** Endo Total and phospho-ERK1/2 **D.** GAPDH as loading control.
